# Supplementary material
Source: PubMed Central journal article supplement (PMC3423609)
Supplement: supp_en.2012-1353_12-1353_Supplemental_Data.pdf [file supp_en.2012-1353_12-1353_Supplemental_Data.pdf]

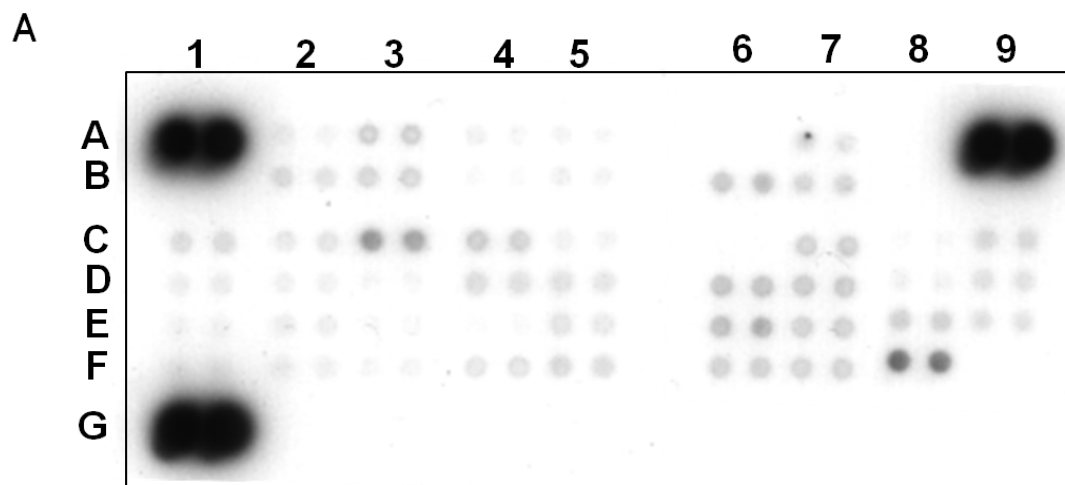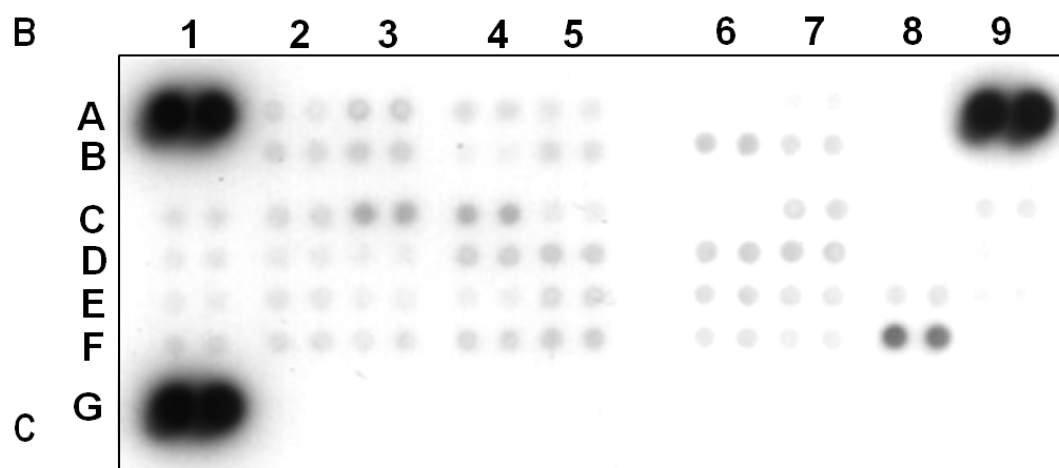

**C**

|   | 1                | 2            | 3       | 4               | 5                    | 6                | 7                | 8          | 9                |
|---|------------------|--------------|---------|-----------------|----------------------|------------------|------------------|------------|------------------|
| A | Positive Control | p38 $\alpha$ | ERK1/2  | JNK             | GSK-3 $\alpha/\beta$ | Blank            | p53 (S392)       | Blank      | Positive Control |
| B | Blank            | MEK 1/2      | MSK 1/2 | AMPK $\alpha$ 1 | AKT (S473)           | Akt (T308)       | p53 (S46)        | Blank      | Blank            |
| C | TOR              | CREB         | HSP27   | AMPK $\alpha$ 2 | B-catenin            | p70 S6 K (T389)  | p53 (S15)        | P27 (T198) | Paxillin         |
| D | Src              | Lyn          | Lck     | STAT2           | STAT5a               | p70 S6 Ki (T421) | RSK 1/2/3 (S380) | P27 (T157) | PLC $\gamma$ -1  |
| E | Fyn              | Yes          | Fgr     | STAT3           | STAT5b               | p70 S6 Ki (T229) | RSK 1/2 (S221)   | c-jun      | Pyk2             |
| F | Hck              | Chk-2        | FAK     | STAT6           | STAT5a/b             | Stat1            | Stat4            | eNOS       | Blank            |
| G | Positive Control | Blank        | Blank   | Blank           | Blank                | Blank            | Blank            | Blank      | Blank            |

**Supplemental Figure 1.** *Phospho-kinase array of selected kinases in female ArKO and WT hearts.* The phosphorylation level of 46 intracellular kinases in female WT (A) vs. female ArKO (B) was measured using a phospho-kinase array. Cardiac lysates from three animals per group were pooled for each array. (C) The location of specific kinases on the phospho-kinase array.

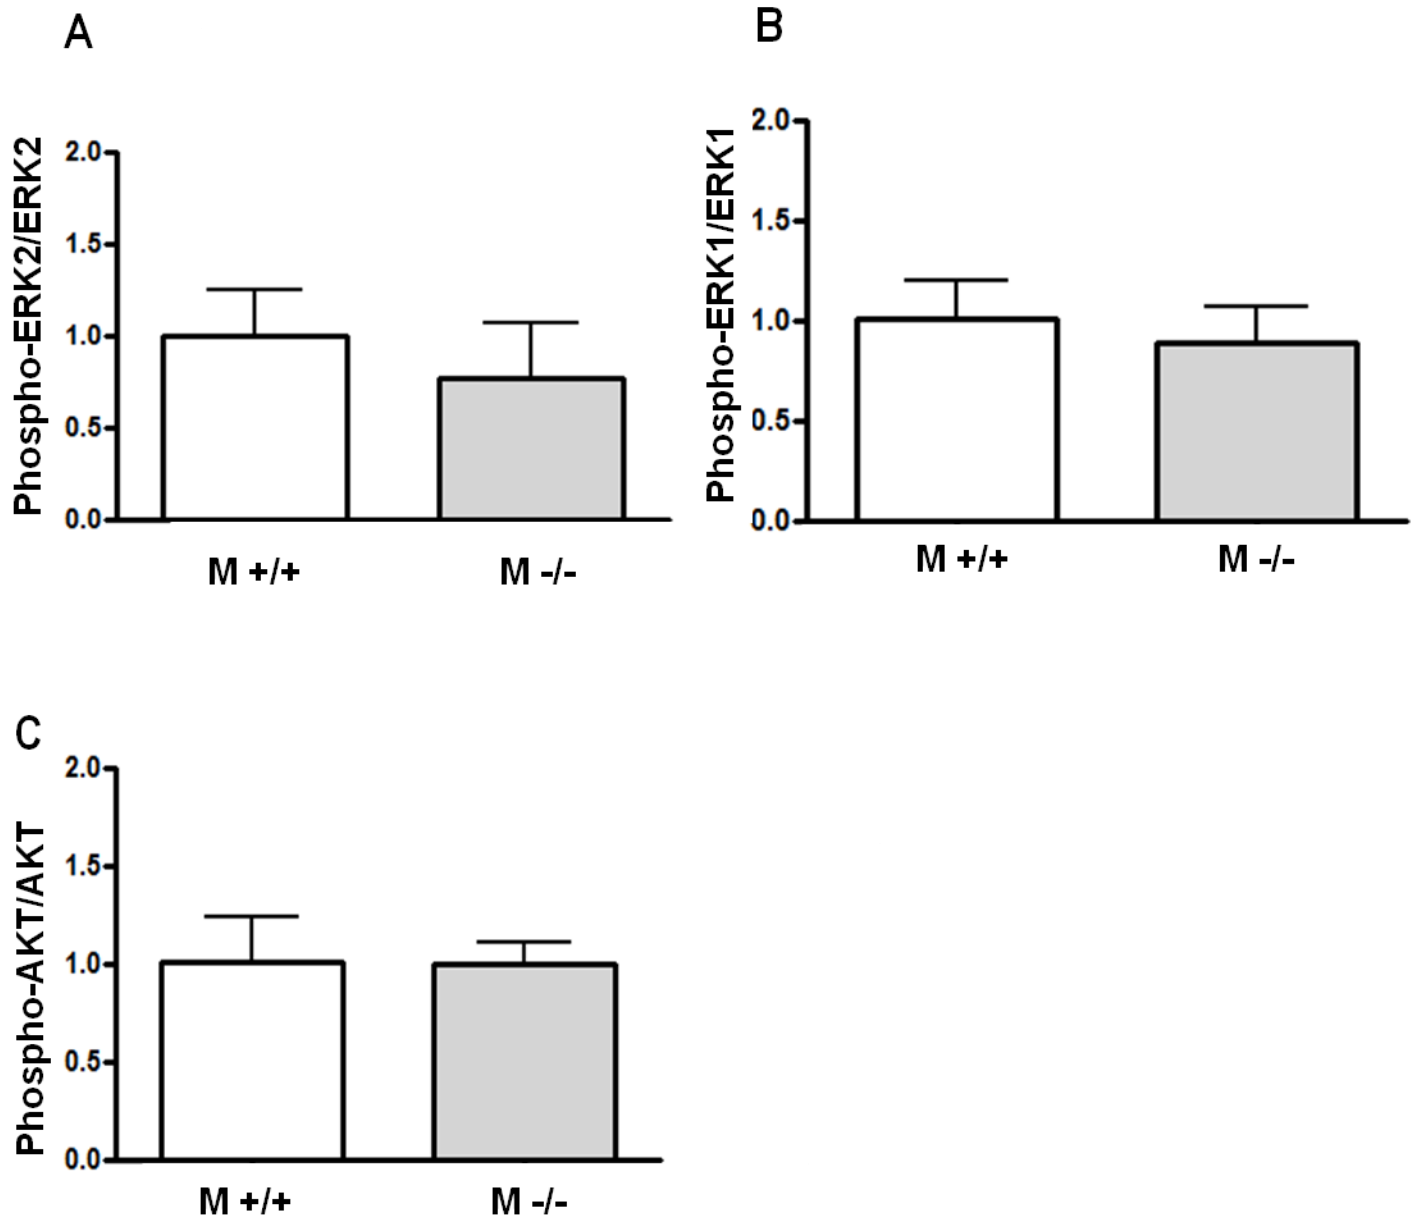

**Supplemental Figure 2.** *Phosphorylation of selected kinases in male ArKO mouse hearts.* Quantification of western blot analyses of pERK2/ERK2 (A), pERK1/ERK1 (B), and pAKT/AKT (C) in male WT and ArKO hearts.

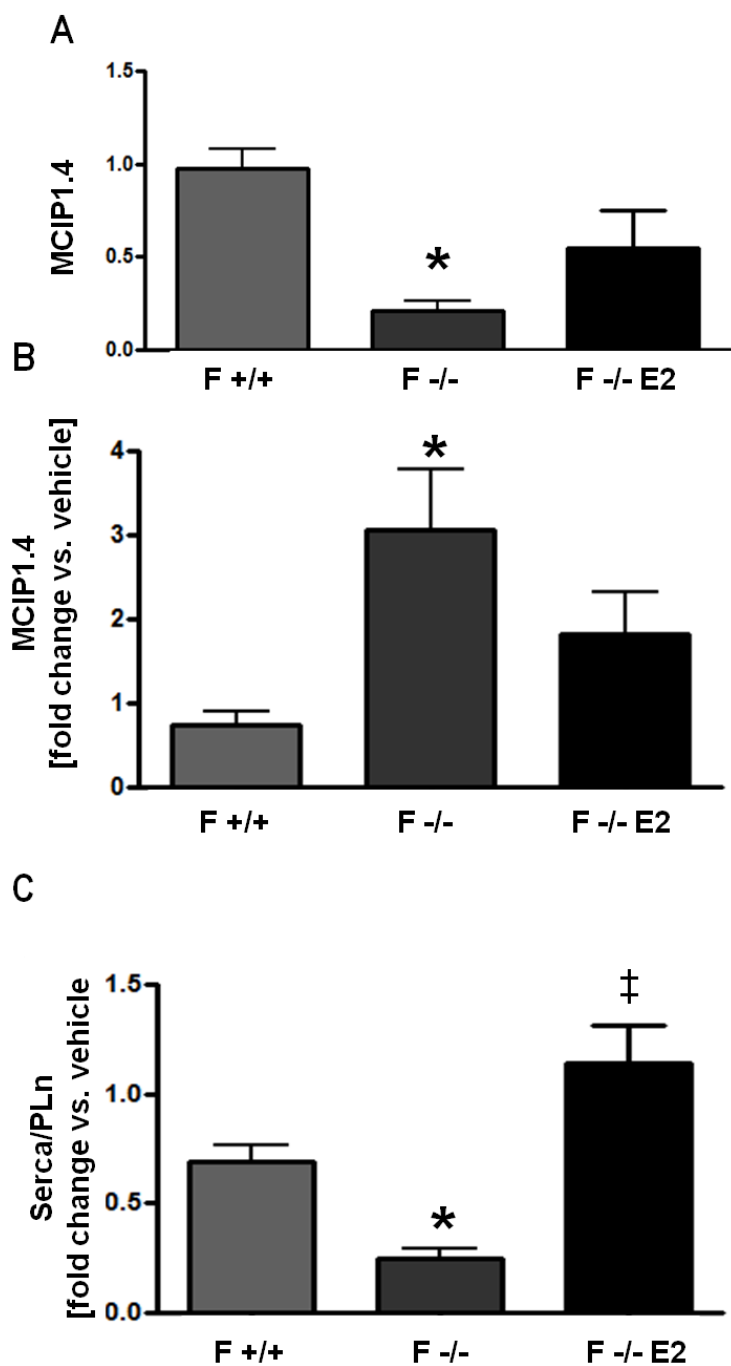

**Supplemental Figure 3. Transcriptional analyses of the selected genes.** (A) MCIP1.4 mRNA levels in vehicle-treated animals. (B) Fold change of MCIP1.4 after 7 days of Iso treatment compared to vehicle controls. (C) Fold change of the ratio of SERCA to PLN after 7 days of Iso treatment compared to vehicle controls. All genes were measured using qRT-PCR and normalized to 18s.. \*,  $p < 0.05$  relative to F +/+, ‡,  $p < 0.05$  relative to F -/-, n=4-5 animals per group

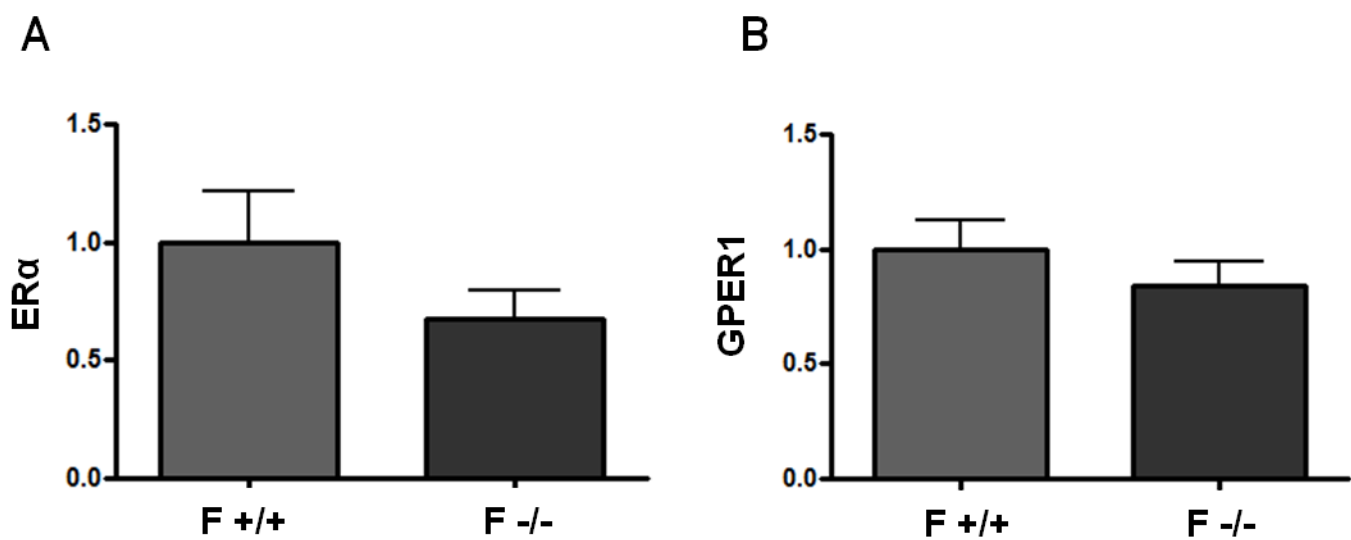

**Supplemental Figure 3.** *Transcriptional analyses of the selected genes.* (A) ER $\alpha$  mRNA levels in WT and ArKO females (B) GPER1 mRNA levels in WT and ArKO mice. All genes were measured using qRT-PCR and normalized to GAPDH, n=4-5 animals per group

|               |                 | BW (g)     | HW (mg)    | LVW (mg)  | HW/BW (mg/g) |
|---------------|-----------------|------------|------------|-----------|--------------|
| <b>Female</b> |                 |            |            |           |              |
|               | WT Vehicle      | 25.9 ± 0.6 | 137 ± 3.3  | 100 ± 3.1 | 5.3 ± 0.17   |
|               | WT Iso          | 25.3 ± 0.6 | 153 ± 3.45 | 115 ± 4.5 | 6.1 ± 0.10   |
|               | ArKO Vehicle    | 26.9 ± 0.8 | 119 ± 5.7  | 83 ± 5.4  | 4.4 ± 0.15   |
|               | ArKO Iso        | 26.7 ± 0.9 | 151 ± 4.5  | 109 ± 5.1 | 5.7 ± 0.12   |
|               | ArKO E2 Vehicle | 23.7 ± 1.1 | 118 ± 8.9  | 88 ± 7.6  | 4.9 ± 0.26   |
|               | ArKO E2 Iso     | 21.8 ± 3.9 | 136 ± 23.4 | 102 ± 18  | 6.3 ± 0.98   |
| <b>Male</b>   |                 |            |            |           |              |
|               | WT Vehicle      | 31.8 ± 1.0 | 151 ± 6.4  | 107 ± 6.4 | 4.8 ± 0.16   |
|               | WT Iso          | 31.9 ± 1.0 | 181 ± 6.9  | 135 ± 5.9 | 5.7 ± 0.17   |
|               | ArKO Vehicle    | 31.4 ± 1.1 | 146 ± 5.8  | 108 ± 2.3 | 4.7 ± 0.30   |
|               | ArKO Iso        | 28.5 ± 0.6 | 173 ± 3.0  | 126 ± 2.4 | 6.1 ± 0.14   |

**Supplemental Table 1** – *Morphometric parameters of mice treated for seven days with vehicle or Isoproterenol.*

|               |                | BW (g)     | HW (mg)     | LVW (mg)  | HW/BW (mg/g) |
|---------------|----------------|------------|-------------|-----------|--------------|
| <b>Female</b> |                |            |             |           |              |
|               | WT Sedentary   | 24.5 ± 1.0 | 124 ± 4.3   | 95 ± 1.3  | 5.1 ± 0.22   |
|               | WT Exercise    | 23.3 ± 0.5 | 138 ± 5.3   | 110 ± 2.6 | 5.9 ± 0.16   |
|               | ArKO Sedentary | 30.0 ± 1.3 | 127 ± 3.4   | 97 ± 2.0  | 4.3 ± .15    |
|               | ArKO Exercise  | 25.0 ± 1.6 | 138 ± 7.3   | 105 ± 3.2 | 5.6 ± 0.26   |
| <b>Male</b>   |                |            |             |           |              |
|               | WT Sedentary   | 36.3 ± 1.7 | 153 ± 3.5   | 114 ± 4.0 | 4.3 ± 0.17   |
|               | WT Exercise    | 28.2 ± 1.1 | 156 ± 6.7   | 126 ± 2.0 | 5.6 ± 0.11   |
|               | ArKO Sedentary | 32.7 ± 1.8 | 146.4 ± 6.7 | 103 ± 7.1 | 4.5 ± 0.22   |
|               | ArKO Exercise  | 28.5 ± 0.6 | 159 ± 5.3   | 120 ± 5.7 | 5.6 ± 0.16   |

**Supplemental Table 2** – *Morphometric parameters of sedentary mice or mice exercised for twenty-one days.*

|               |                | BW (g)     | HW (mg)   | LVW (mg)  | HW/BW (mg/g) |
|---------------|----------------|------------|-----------|-----------|--------------|
| <b>Female</b> |                |            |           |           |              |
|               | WT Sedentary   | 24.5 ± 1.0 | 124 ± 4.3 | 95 ± 1.3  | 5.1 ± 0.22   |
|               | WT Exercise    | 22.8 ± 0.6 | 136 ± 4.6 | 102 ± 3.0 | 5.9 ± 0.19   |
|               | ArKO Sedentary | 30.0 ± 1.3 | 127 ± 3.4 | 97 ± 2.0  | 4.3 ± .15    |
|               | ArKO Exercise  | 25.5 ± 0.9 | 132 ± 3.5 | 98 ± 1.6  | 5.2 ± 0.23   |

**Supplemental Table 3** – *Morphometric parameters of sedentary mice or mice exercised for seven days.*

| <b>Gene</b>                  | <b>Forward Primer</b>       | <b>Reverse Primer</b>         |
|------------------------------|-----------------------------|-------------------------------|
| <b>GATA-4</b>                | 5'-CCCTACCCAGCCTACATGG-3'   | 5'-ACATATCGAGATTGGGGTGTCT-3'  |
| <b>NKX2.5</b>                | 5'-CAAGTGCTCTCCTGCTTTCC-3'  | 5'-CTTTGTCCAGCTCCACTGC-3'     |
| <b>ANF</b>                   | 5'-CCAGGCCATATTGGAGCAA-3'   | 5'-GAAGCTGTTGCAGCCTAGTC-3'    |
| <b>MCIP1.4</b>               | 5'-AGCTCCCTGATTGCTTGTGT-3'  | 5'-TGGAAGGTGGTGTCTTGT-3'      |
| <b>SERCA</b>                 | 5'-TGTAAGTGCCAGATTGCTC-3'   | 5'-CCTAAACAACCTGAAGTTAGG-3'   |
| <b>PLN</b>                   | 5'-GTTGTGCCCTTTTTCTACAC-3'  | 5'-AGAGAGAGCAGATTTGTGG-3'     |
| <b>ER<math>\alpha</math></b> | 5'-GATCATGGAGTCTGCCAAGGA-3' | 5'-AGCCAGAGGCATAGTCATTGC-3'   |
| <b>GPER1</b>                 | 5'-TCTAGGGAGAAAGCCATCCA-3'  | 5'-TGTCTGATGTCTGGGCTGGT-3'    |
| <b>18s</b>                   | 5'-GCCGCTAGAGGTGAAATTCTT-3' | 5'-CTTTCGCTCTGGTCCGTCTT-3'    |
| <b>GAPDH</b>                 | 5'-AGGTCGGTGTGAACGGATTTG-3' | 5'-TGTAGACCATGTAGTTGAGGTCA-3' |

**Supplemental Table 4 – Primer sequences used for Quantitative PCR**
